# Supplementary material for: An integrated strategy for quality control of the multi-origins herb medicine of Gentianae Macrophyllae Radix based on UPLC-Orbitrap-MS/MS and HPLC-DAD
Source: Royal Society of Chemistry journal article supplement (doi:10.1039/d2ra07591a), 2023-01-01
Supplement: d2ra07591a1.pdf [file d2ra07591a1.pdf]

Table S1 Retention time and peak area of the analysts in method validation.

| Project       | Group   | RT (min)     |                                 |               |                |           |              | RA (mAu)                        |               |                |           |  |  |
|---------------|---------|--------------|---------------------------------|---------------|----------------|-----------|--------------|---------------------------------|---------------|----------------|-----------|--|--|
|               |         | Loganic acid | 6'-O-β-D-glucosylgentiopicoside | Swertiamarine | Gentiopicoside | Sweroside | Loganic acid | 6'-O-β-D-glucosylgentiopicoside | Swertiamarine | Gentiopicoside | Sweroside |  |  |
| Precision     | 1       | 14.97        | 16.58                           | 17.63         | 20.40          | 22.11     | 1067.26      | 69.65                           | 214.48        | 2280.31        | 94.28     |  |  |
|               | 2       | 15.00        | 16.61                           | 17.66         | 20.42          | 22.13     | 1065.54      | 69.64                           | 214.17        | 2276.76        | 94.41     |  |  |
|               | 3       | 15.01        | 16.62                           | 17.66         | 20.42          | 22.12     | 1065.12      | 69.69                           | 214.02        | 2277.37        | 94.90     |  |  |
|               | 4       | 14.98        | 16.59                           | 17.64         | 20.41          | 22.12     | 1064.95      | 69.17                           | 213.22        | 2277.57        | 94.42     |  |  |
|               | 5       | 14.98        | 16.58                           | 17.64         | 20.41          | 22.12     | 1064.79      | 69.28                           | 212.83        | 2273.75        | 94.58     |  |  |
|               | 6       | 14.97        | 16.58                           | 17.64         | 20.41          | 22.13     | 1065.19      | 69.50                           | 213.33        | 2280.96        | 95.00     |  |  |
|               | RSD (%) | 0.10         | 0.10                            | 0.07          | 0.04           | 0.03      | 0.09         | 0.31                            | 0.30          | 0.11           | 0.30      |  |  |
| Repeatability | 1       | 14.84        | 16.43                           | 17.48         | 20.28          | 22.01     | 1049.54      | 66.64                           | 204.33        | 2224.10        | 94.27     |  |  |
|               | 2       | 14.90        | 16.49                           | 17.54         | 20.33          | 22.05     | 1067.21      | 68.79                           | 211.86        | 2284.84        | 95.10     |  |  |
|               | 3       | 14.94        | 16.54                           | 17.58         | 20.36          | 22.07     | 1073.50      | 69.13                           | 212.77        | 2293.49        | 95.28     |  |  |
|               | 4       | 14.92        | 16.55                           | 17.59         | 20.37          | 22.08     | 1100.55      | 70.65                           | 216.14        | 2341.47        | 99.25     |  |  |
|               | 5       | 14.93        | 16.52                           | 17.58         | 20.36          | 22.07     | 1097.94      | 70.83                           | 216.62        | 2356.39        | 99.00     |  |  |
|               | 6       | 14.96        | 16.57                           | 17.61         | 20.39          | 22.10     | 1086.71      | 69.94                           | 214.65        | 2335.57        | 96.94     |  |  |
|               | RSD (%) | 0.28         | 0.30                            | 0.26          | 0.18           | 0.14      | 1.82         | 2.23                            | 2.12          | 2.12           | 2.19      |  |  |
| Stability     | 0 h     | 14.88        | 16.48                           | 17.54         | 20.32          | 22.04     | 1055.34      | 67.67                           | 210.04        | 2244.22        | 94.88     |  |  |
|               | 2 h     | 14.90        | 16.50                           | 17.56         | 20.34          | 22.05     | 1056.36      | 67.83                           | 206.89        | 2250.74        | 89.74     |  |  |
|               | 4 h     | 15.14        | 16.72                           | 17.74         | 20.44          | 22.12     | 1057.59      | 70.23                           | 214.28        | 2247.66        | 88.95     |  |  |
|               | 8 h     | 14.90        | 16.49                           | 17.56         | 20.34          | 22.05     | 1053.92      | 67.77                           | 211.17        | 2251.41        | 91.18     |  |  |
|               | 12 h    | 14.78        | 16.37                           | 17.44         | 20.25          | 21.97     | 1084.68      | 69.74                           | 214.54        | 2321.49        | 91.77     |  |  |
|               | 24 h    | 14.89        | 16.48                           | 17.53         | 20.32          | 22.04     | 1058.97      | 68.39                           | 207.62        | 2256.31        | 90.09     |  |  |
|               | 48 h    | 14.82        | 16.41                           | 17.47         | 20.27          | 21.99     | 1094.52      | 70.20                           | 213.35        | 2333.03        | 93.25     |  |  |
|               | 96 h    | 14.81        | 16.39                           | 17.45         | 20.24          | 21.96     | 1071.71      | 69.02                           | 211.79        | 2287.03        | 88.60     |  |  |
|               | RSD (%) | 0.75         | 0.66                            | 0.54          | 0.31           | 0.23      | 1.63         | 1.68                            | 1.59          | 1.73           | 1.71      |  |  |

Table S2 The durability result of the HPLC method.

| Analyte         | Instrument    | Column                                    | Loganic acid |           | 6'-O- $\beta$ -D-glucosylgentiopicroside |           | Swertiamarine |           | Gentiopicroside |           | Sweroside |           |
|-----------------|---------------|-------------------------------------------|--------------|-----------|------------------------------------------|-----------|---------------|-----------|-----------------|-----------|-----------|-----------|
|                 |               |                                           | RRT (min)    | RPA (mAu) | RRT (min)                                | RPA (mAu) | RRT (min)     | RPA (mAu) | RRT (min)       | RPA (mAu) | RRT (min) | RPA (mAu) |
| Sample          | Agilent 1260  | Waters Atlantis® T3, 4.6×250mm, 5 $\mu$ m | 0.73         | 0.47      | 0.81                                     | 0.03      | 0.86          | 0.09      | 1.00            | 1.00      | 1.08      | 0.04      |
|                 | Infinity II   | Agilent 5 TC-C18, 4.6×250 mm              | 0.73         | 0.46      | 0.81                                     | 0.03      | 0.84          | 0.09      | 1.00            | 1.00      | 1.09      | 0.04      |
|                 |               | YMC-PACK ODS-A, 150×4.6mm, 5 $\mu$ m      | 0.66         | 0.46      | 0.75                                     | 0.03      | 0.81          | 0.09      | 1.00            | 1.00      | 1.15      | 0.04      |
|                 | SHIMADZU      | Waters Atlantis® T3, 4.6×250mm, 5 $\mu$ m | 0.75         | 0.43      | 0.82                                     | 0.03      | 0.87          | 0.09      | 1.00            | 1.00      | 1.08      | 0.04      |
|                 | Nexera LC-40D | Agilent 5 TC-C18, 4.6×250 mm              | 0.74         | 0.43      | 0.82                                     | 0.03      | 0.85          | 0.08      | 1.00            | 1.00      | 1.09      | 0.04      |
|                 |               | YMC-PACK ODS-A, 150×4.6mm, 5 $\mu$ m      | 0.66         | 0.45      | 0.76                                     | 0.03      | 0.81          | 0.08      | 1.00            | 1.00      | 1.15      | 0.04      |
| Mixed standards | Agilent 1260  | Waters Atlantis® T3, 4.6×250mm, 5 $\mu$ m | 0.73         | 0.33      | 0.81                                     | 0.09      | 0.86          | 0.10      | 1.00            | 1.00      | 1.08      | 0.08      |
|                 | Infinity II   | Agilent 5 TC-C18, 4.6×250 mm              | 0.73         | 0.33      | 0.81                                     | 0.10      | 0.84          | 0.10      | 1.00            | 1.00      | 1.09      | 0.08      |
|                 |               | YMC-PACK ODS-A, 150×4.6mm, 5 $\mu$ m      | 0.67         | 0.33      | 0.76                                     | 0.10      | 0.81          | 0.10      | 1.00            | 1.00      | 1.15      | 0.08      |
|                 | SHIMADZU      | Waters Atlantis® T3, 4.6×250mm, 5 $\mu$ m | 0.75         | 0.30      | 0.82                                     | 0.09      | 0.87          | 0.10      | 1.00            | 1.00      | 1.08      | 0.08      |
|                 | Nexera LC-40D | Agilent 5 TC-C18, 4.6×250 mm              | 0.74         | 0.30      | 0.82                                     | 0.10      | 0.85          | 0.10      | 1.00            | 1.00      | 1.09      | 0.08      |
|                 |               | YMC-PACK ODS-A, 150×4.6mm, 5 $\mu$ m      | 0.67         | 0.31      | 0.76                                     | 0.10      | 0.81          | 0.09      | 1.00            | 1.00      | 1.15      | 0.08      |

Table S3 Co-relationships of five active compounds in *Gentianae Macrophyllae Radix*.

|                                                   | Sweroside | 6'- <i>O</i> - $\beta$ -D-glucosylgentiopicroside | Loganic acid | Swertiamarine | Gentiopicroside |
|---------------------------------------------------|-----------|---------------------------------------------------|--------------|---------------|-----------------|
| Sweroside                                         | 1         | -0.4211*                                          | -0.061793    | -0.048271     | -0.15493        |
| 6'- <i>O</i> - $\beta$ -D-glucosylgentiopicroside |           | 1                                                 | 0.3788*      | 0.33998       | 0.40388*        |
| Loganic acid                                      |           |                                                   | 1            | 0.66155**     | 0.65182**       |
| Swertiamarine                                     |           |                                                   |              | 1             | 0.97185**       |
| Gentiopicroside                                   |           |                                                   |              |               | 1               |

\* $p < 0.05$ ; \*\* $p < 0.01$ .

Table S4 Response factors for the compounds.

| No.     | Loganic acid           |                |                | 6'-O-β-D-Glucosylgentiopicroside |                |                | Swertiamarine          |                |                | Gentiopicroside        |                | Sweroside              |                |                |
|---------|------------------------|----------------|----------------|----------------------------------|----------------|----------------|------------------------|----------------|----------------|------------------------|----------------|------------------------|----------------|----------------|
|         | C <sub>1</sub> (mg/ml) | A <sub>1</sub> | F <sub>1</sub> | C <sub>2</sub> (mg/ml)           | A <sub>2</sub> | F <sub>2</sub> | C <sub>3</sub> (mg/ml) | A <sub>3</sub> | F <sub>3</sub> | C <sub>4</sub> (mg/ml) | A <sub>4</sub> | C <sub>5</sub> (mg/ml) | A <sub>5</sub> | F <sub>5</sub> |
| 1       | 0.006563               | 53.846         | 0.76           | 0.0046875                        | 14.742         | 1.98           | 0.00189375             | 20.365         | 0.58           | 0.0253125              | 157.513        | 0.00165625             | 12.4           | 0.83           |
| 2       | 0.013125               | 105.739        | 0.77           | 0.009375                         | 29.283         | 2.00           | 0.0037875              | 37.561         | 0.63           | 0.050625               | 316.052        | 0.0033125              | 25.005         | 0.83           |
| 3       | 0.02625                | 205.197        | 0.79           | 0.01875                          | 57.995         | 1.98           | 0.007575               | 69.333         | 0.67           | 0.10125                | 621.521        | 0.006625               | 49.765         | 0.82           |
| 4       | 0.0525                 | 390.141        | 0.78           | 0.0375                           | 110.802        | 1.96           | 0.01515                | 126.308        | 0.70           | 0.2025                 | 1175.249       | 0.01325                | 95.474         | 0.81           |
| 5       | 0.105                  | 764.331        | 0.78           | 0.075                            | 218.099        | 1.96           | 0.0303                 | 241.062        | 0.72           | 0.405                  | 2311.412       | 0.0265                 | 188.231        | 0.80           |
| 6       | 0.21                   | 1582.085       | 0.78           | 0.15                             | 453.939        | 1.95           | 0.0606                 | 496.561        | 0.72           | 0.81                   | 4780.446       | 0.053                  | 393.587        | 0.79           |
| Average |                        |                | 0.78           |                                  |                | 1.97           |                        |                | 0.67           |                        |                |                        |                | 0.81           |
| RSD (%) |                        |                | 1.31           |                                  |                | 0.89           |                        |                | 0.08           |                        |                |                        |                | 1.76           |

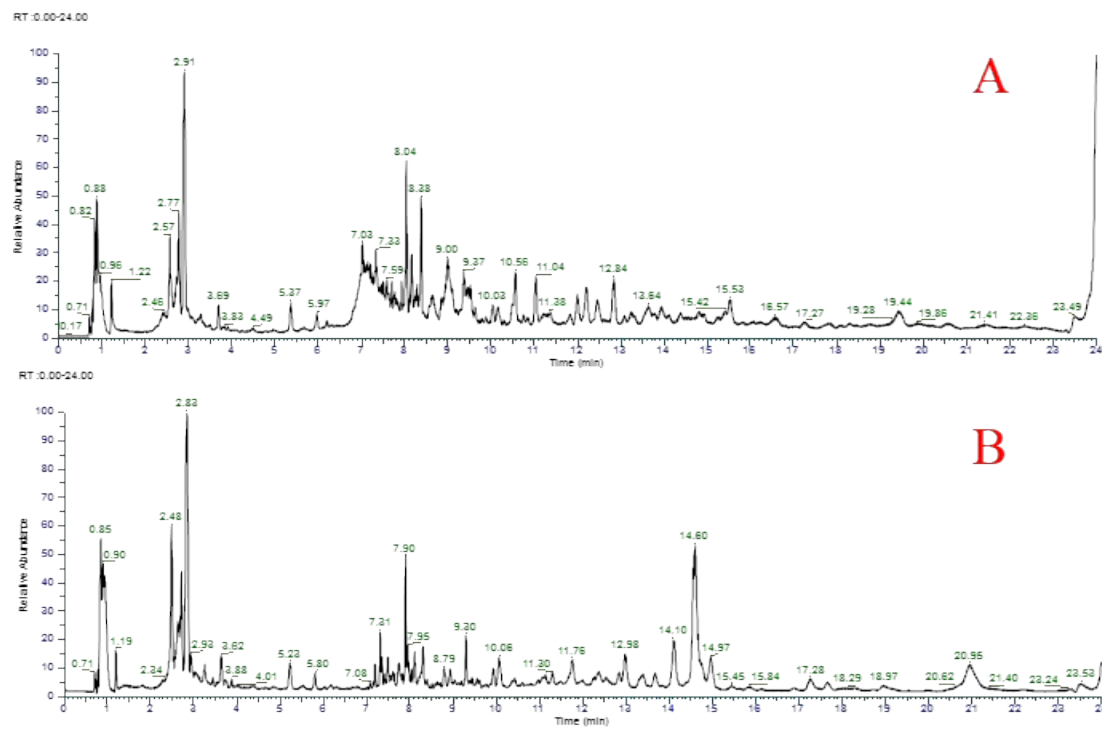

Figure S1 The comparison of positive (A) and negative mode (B) of LC-MS.

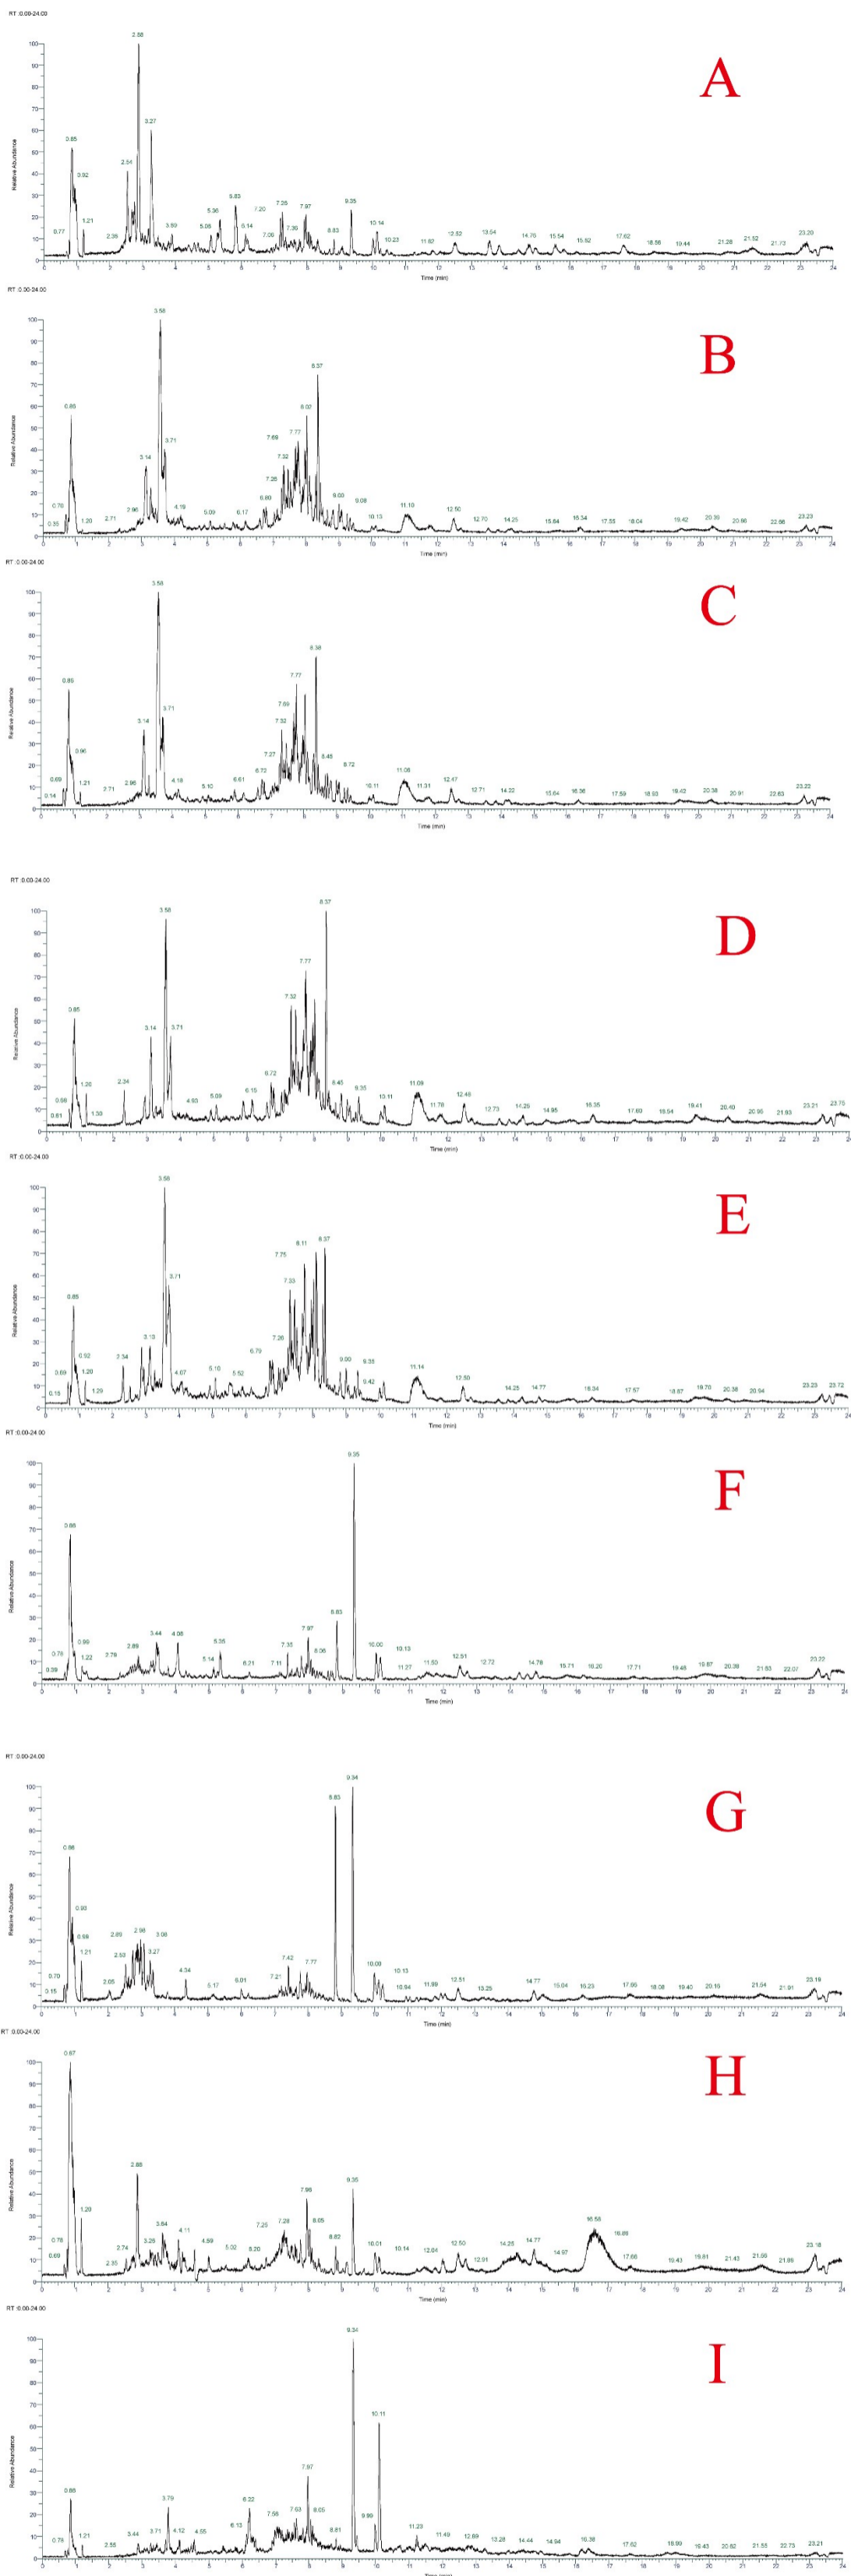

Fig. S2 TIC chromatogram of the adulterants. (A~I represent the adulterant samples A-1~9).

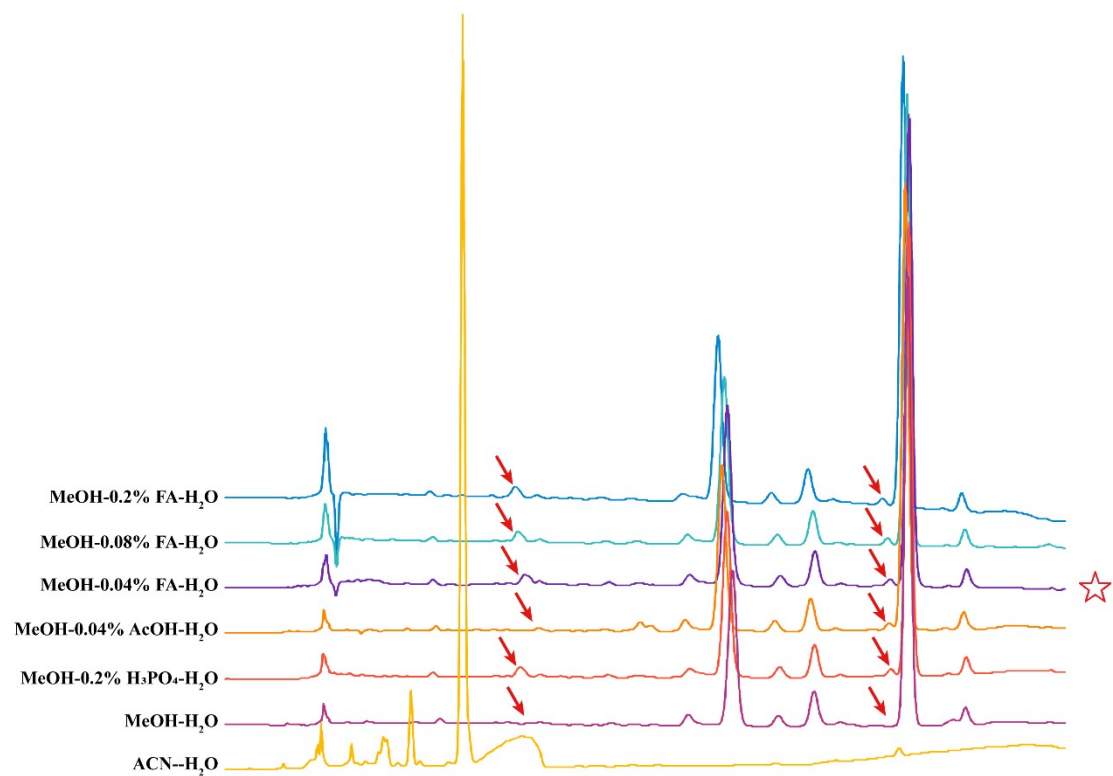

Figure S3 The influence of different acids and PH on the chromatogram.
